# Supplementary material for: Release of hepatic xanthine oxidase (XO) to the circulation is protective in intravascular hemolytic crisis
Source: PubMed Central journal article supplement — Redox Biol. 2023 Feb 13;62:102636. doi: 10.1016/j.redox.2023.102636 (PMC10025133; doi:10.1016/j.redox.2023.102636), 2023-02-13

Figure 1

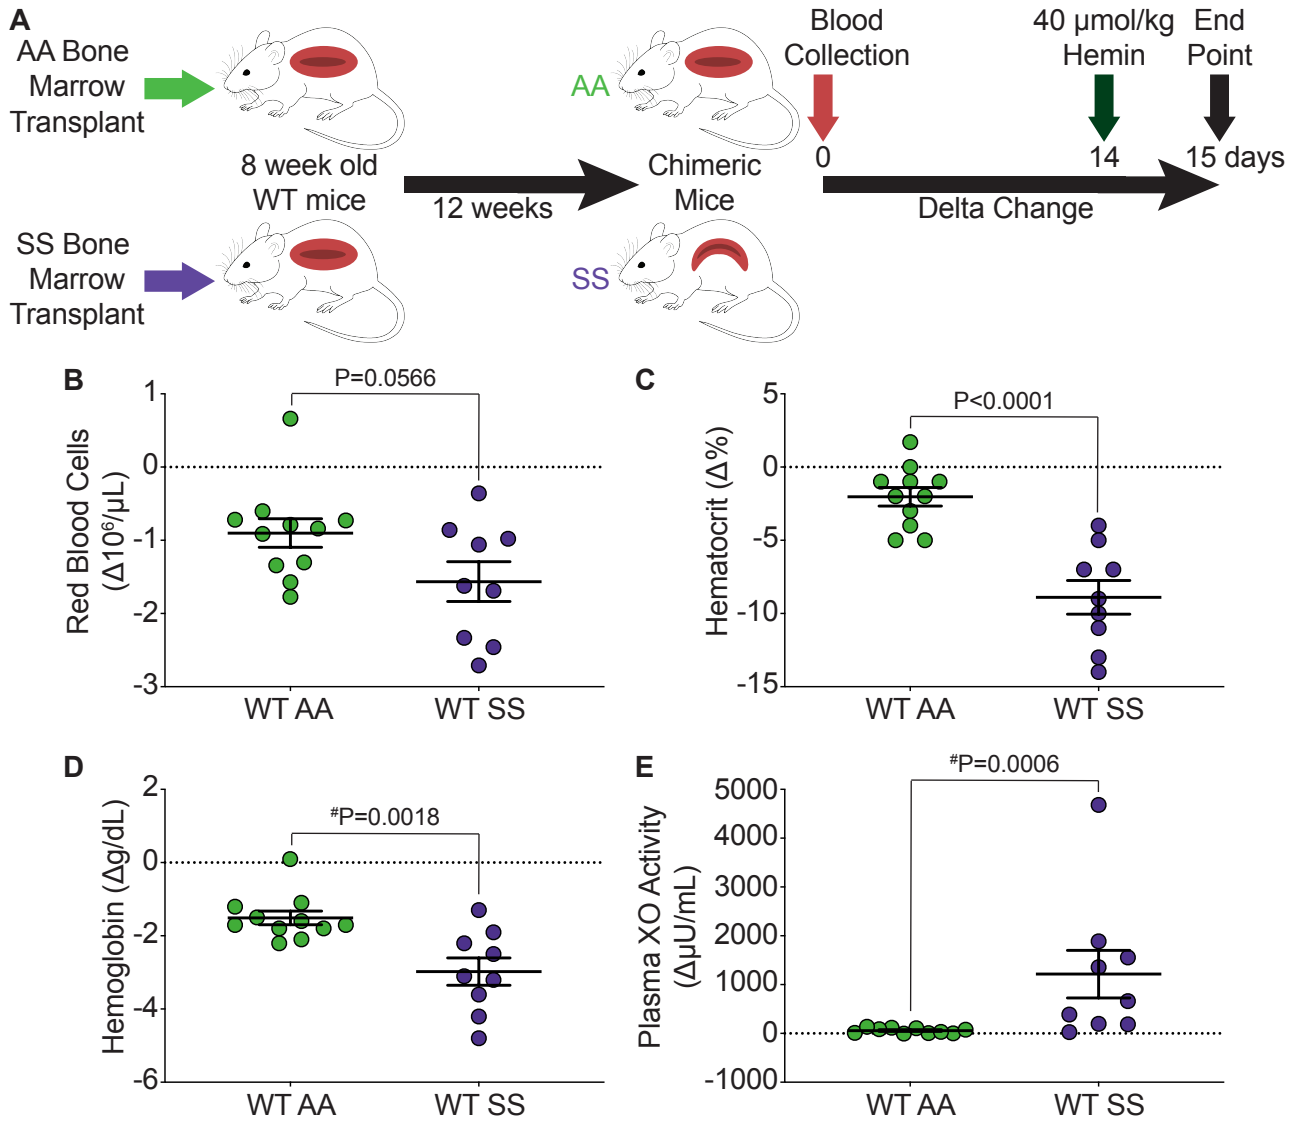

Figure 2

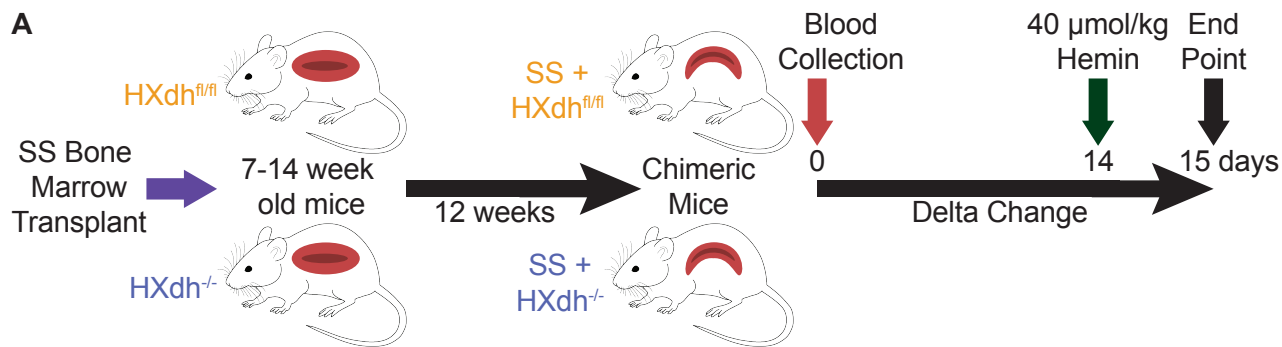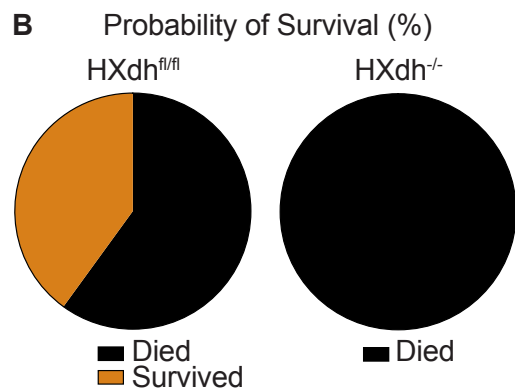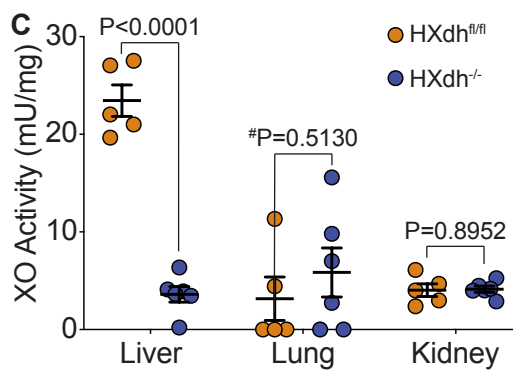

Figure 3

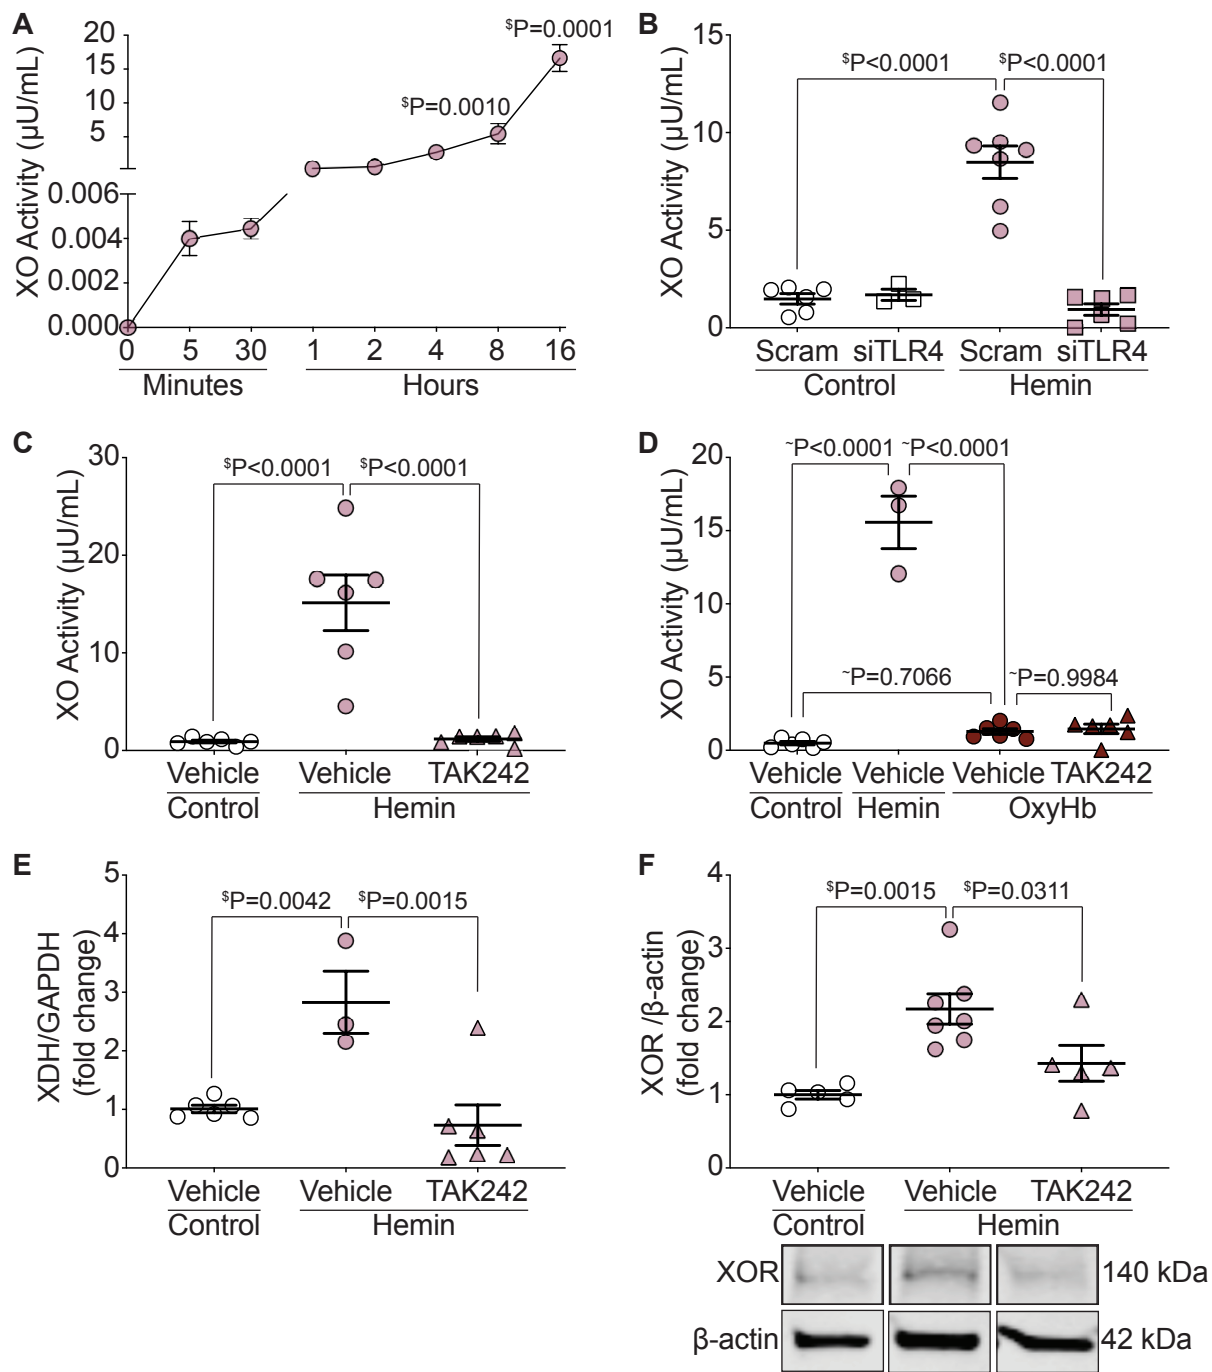

Figure 4

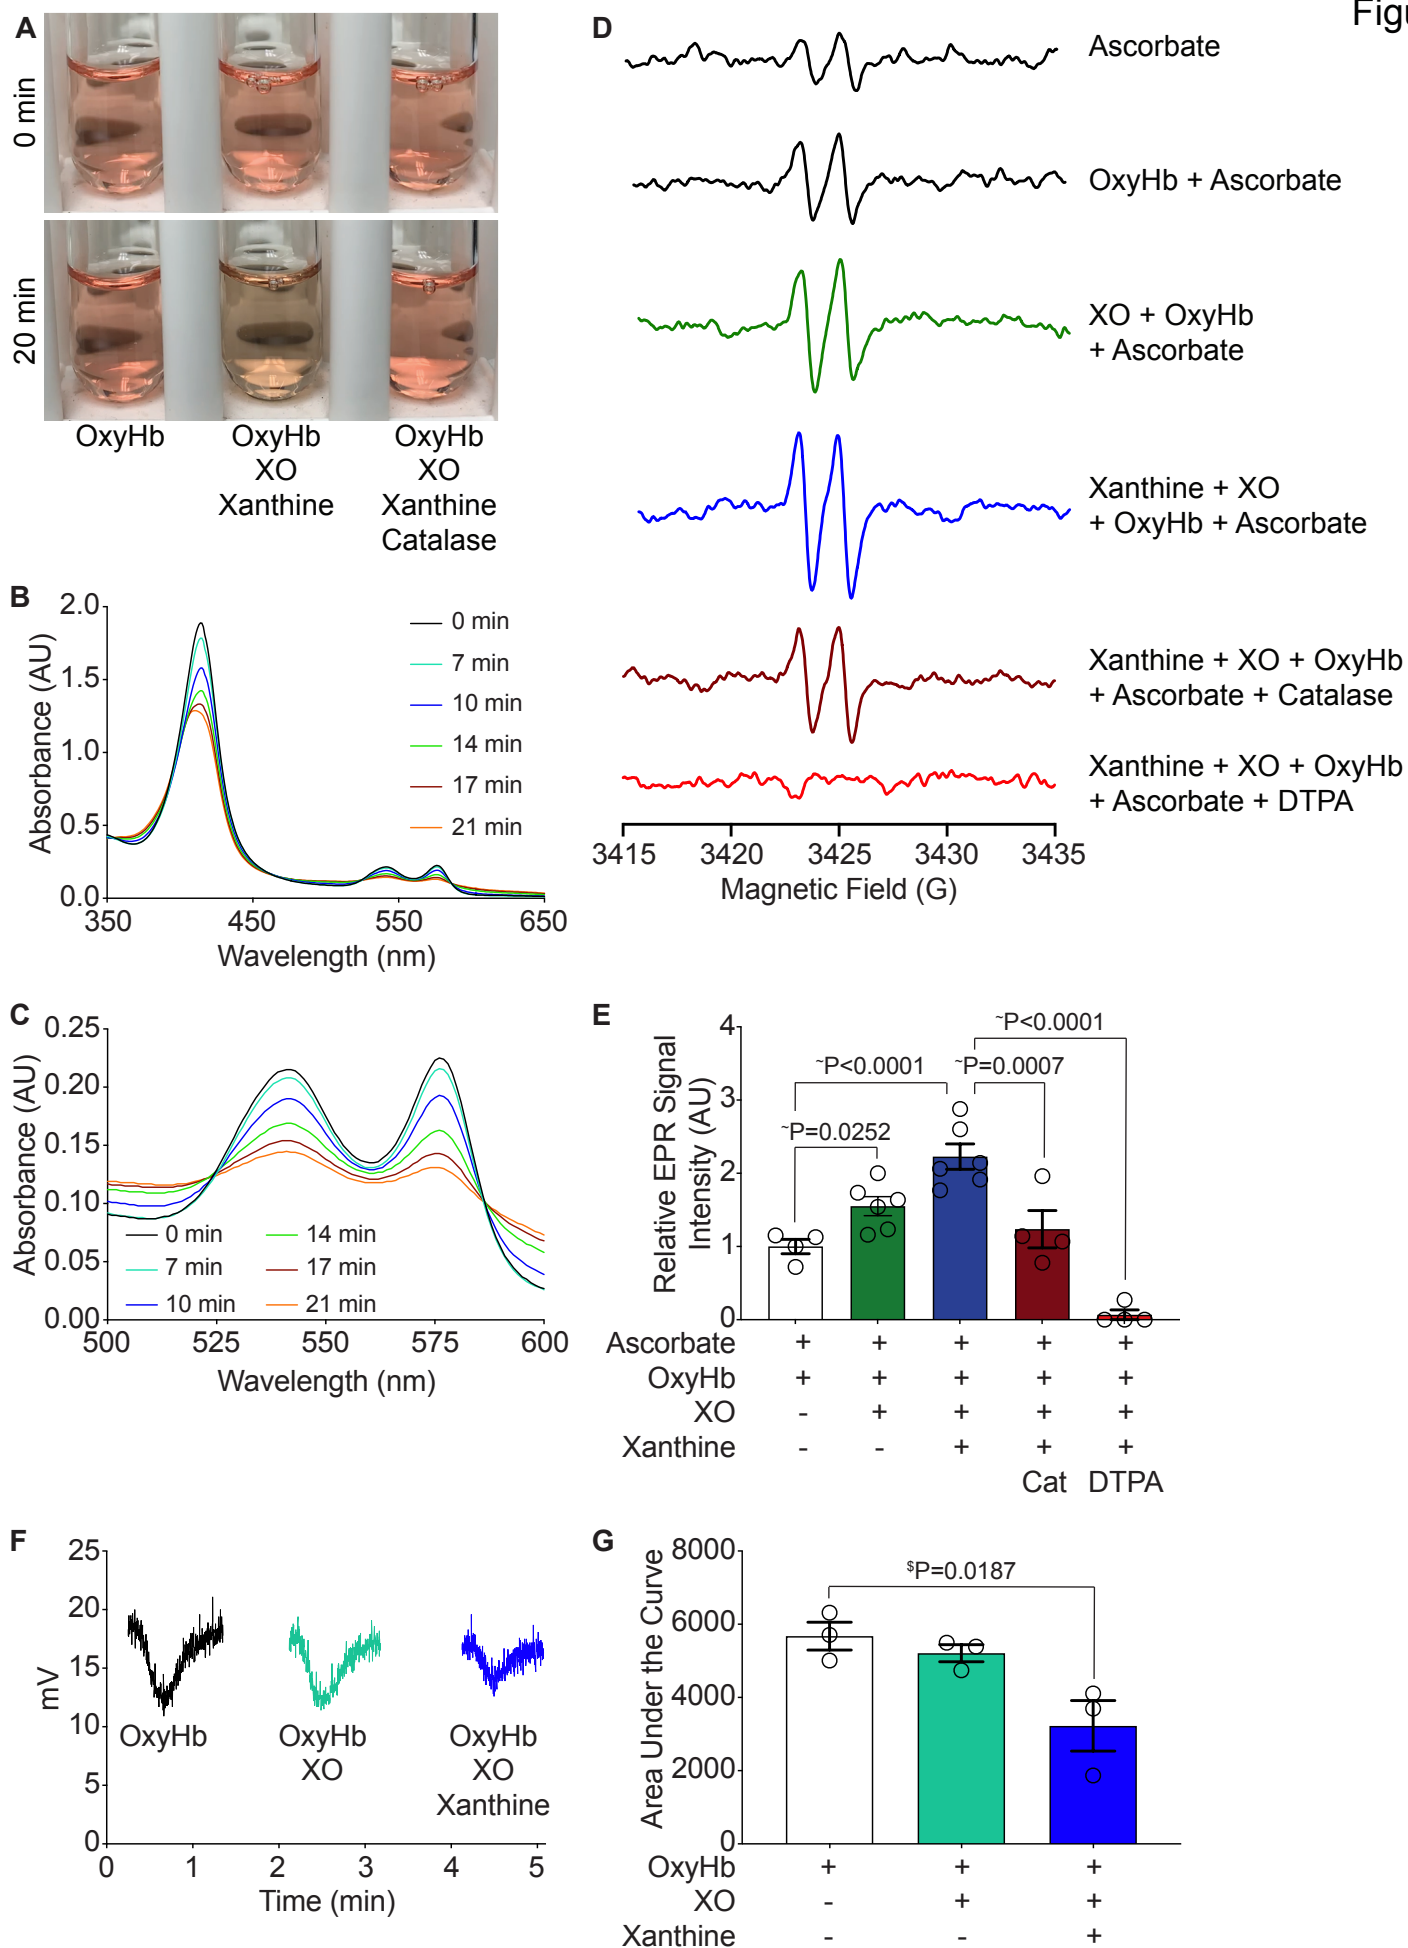

A

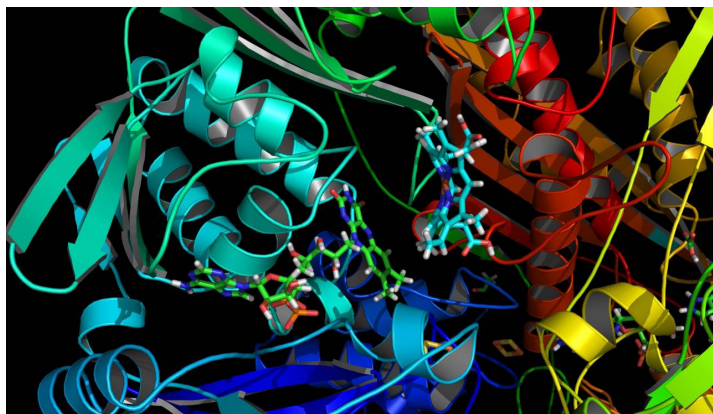

C

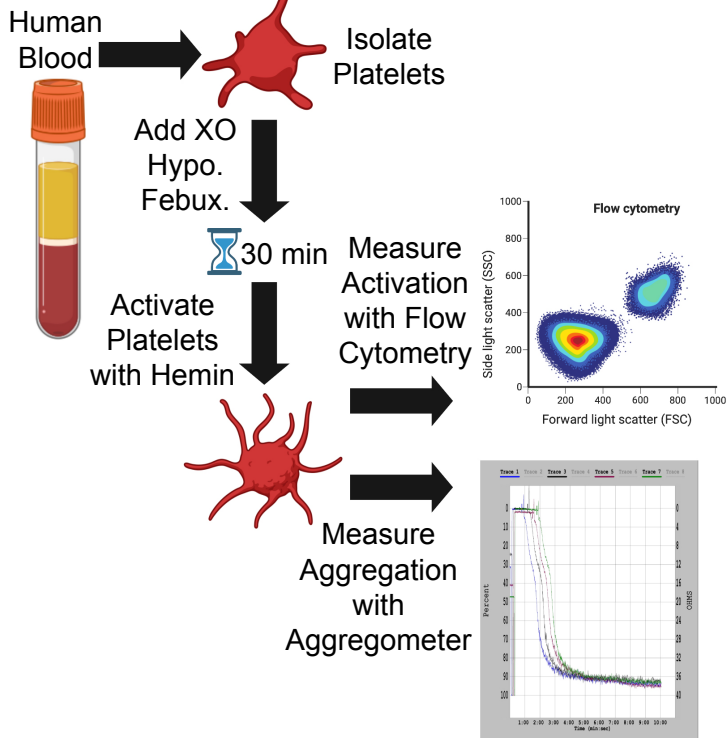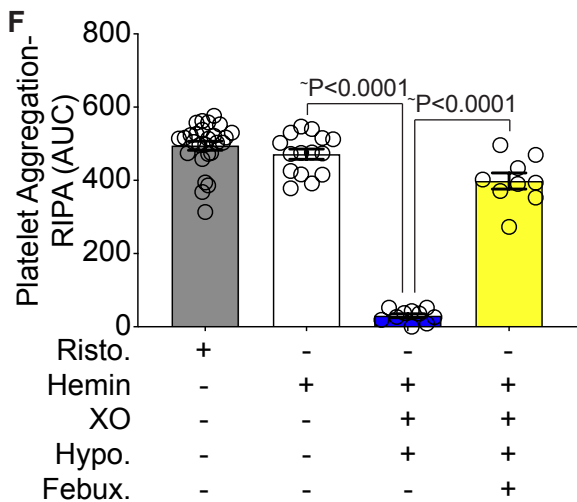

B

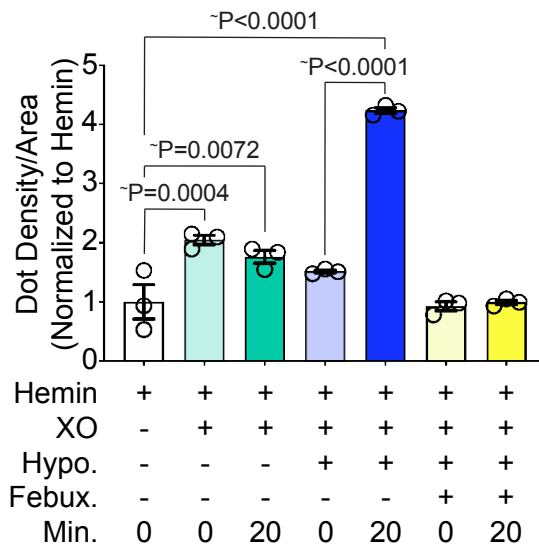

D

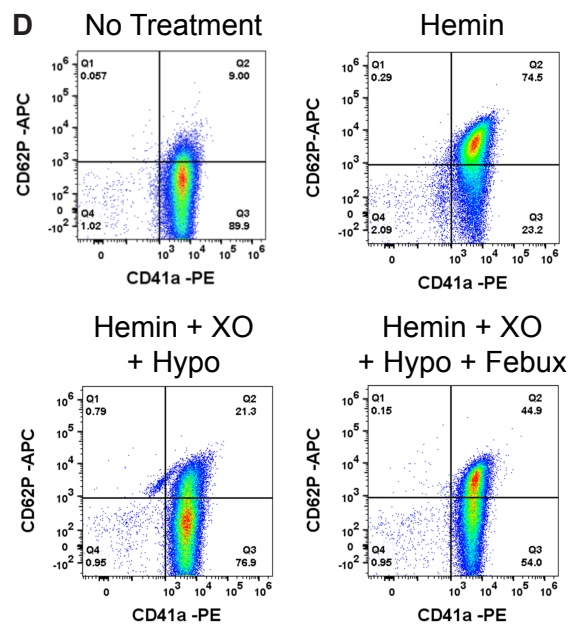

E

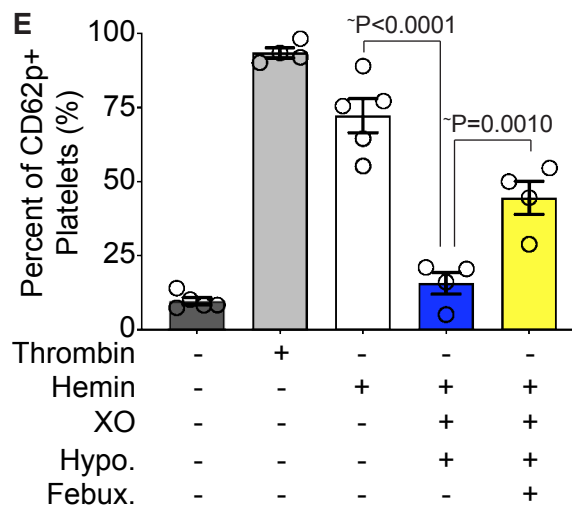



**Supplemental Table I.** Blood cell indices for Townes AA bone marrow transplanted mice at baseline and 24 hours post-hemin challenge.

|                             | Baseline        |                | Post-Hemin Challenge |                | Delta Change    |                | Significance<br>WT AA vs WT SS<br>Delta Change |
|-----------------------------|-----------------|----------------|----------------------|----------------|-----------------|----------------|------------------------------------------------|
|                             | WT AA<br>(n=11) | WT SS<br>(n=9) | WT AA<br>(n=11)      | WT SS<br>(n=9) | WT AA<br>(n=11) | WT SS<br>(n=9) |                                                |
| WBC,<br>10 <sup>3</sup> /μL | 16.36 ± 0.96    | 17.44 ± 1.43   | 15.72 ± 1.62         | 17.11 ± 2.84   | -0.65 ± 1.08    | -0.29 ± 2.49   | +P=0.8978                                      |
| RBC,<br>10 <sup>6</sup> /μL | 10.78 ± 0.19    | 5.65 ± 0.16    | 9.88 ± 0.15          | 4.08 ± 0.21    | -0.90 ± 0.19    | -1.56 ± 0.27   | P=0.0566                                       |
| HCT,<br>%                   | 35.45 ± 0.76    | 28.11 ± 0.70   | 33.64 ± 0.65         | 19.22 ± 0.85   | -2.03 ± 0.63    | -8.89 ± 1.15   | P<0.0001                                       |
| MCV,<br>fl                  | 32.79 ± 0.22    | 49.58 ± 0.39   | 33.84 ± 0.34         | 47.20 ± 0.54   | 1.05 ± 0.20     | -2.38 ± 0.50   | +P<0.0001                                      |
| RDW,<br>%                   | 26.82 ± 0.50    | 34.89 ± 0.79   | 26.93 ± 0.34         | 37.83 ± 0.58   | 0.11 ± 0.29     | 2.94 ± 0.87    | +P=0.0117                                      |
| HGB,<br>g/dL                | 11.91 ± 0.16    | 9.39 ± 0.30    | 10.40 ± 0.15         | 6.41 ± 0.31    | -1.51 ± 0.19    | -2.98 ± 0.37   | #P=0.0018                                      |
| MCH,<br>pg                  | 11.04 ± 0.13    | 16.66 ± 0.19   | 10.52 ± 0.08         | 15.79 ± 0.22   | -0.52 ± 0.07    | -0.87 ± 0.20   | +P=0.1235                                      |
| PLT,<br>10 <sup>3</sup> /μL | 674.73 ± 18.16  | 376.56 ± 21.43 | 597.00 ± 31.65       | 351.22 ± 31.18 | -77.73 ± 35.65  | -25.33 ± 36.03 | P=0.3194                                       |
| MPV,<br>fl                  | 6.78 ± 0.06     | 6.41 ± 0.07    | 6.62 ± 0.10          | 6.70 ± 0.11    | -0.16 ± 0.10    | 0.29 ± 0.09    | P=0.0033                                       |
| Retic,<br>%                 | 5.09 ± 0.23     | 50.09 ± 0.76   | 5.18 ± 0.25          | 45.99 ± 1.50   | 0.09 ± 0.18     | -4.10 ± 1.32   | +P=0.0128                                      |

Definition of abbreviations: WBC = white blood cells; RBC = red blood cells; HCT = hematocrit; MCV = mean corpuscular volume; RDW = red blood cell distribution width; HGB = hemoglobin; MCH = mean corpuscular hemoglobin; PLT = platelets; MPV = mean platelet volume; retic = reticulocytes. Values are mean ± SEM using an unpaired Students t test unless noted otherwise (# Mann Whitney test, + unpaired Students t test with Welch's correction)

**Supplemental Table II.** Hemin injection significantly increased uric acid concentration and XO activity in plasma of SS sickle mice 24 hours post-hemin challenge of treatment.

|                                  | Baseline        |                | Post-Hemin Challenge |                  | Delta Change    |                  | Significance<br>WT AA vs WT SS<br>Delta Change |
|----------------------------------|-----------------|----------------|----------------------|------------------|-----------------|------------------|------------------------------------------------|
|                                  | WT AA<br>(n=10) | WT SS<br>(n=9) | WT AA<br>(n=10)      | WT SS<br>(n=9)   | WT AA<br>(n=10) | WT SS<br>(n=9)   |                                                |
| Plasma Uric Acid,<br>μM          | 0.53 ± 0.15     | 1.91 ± 0.41    | 1.51 ± 0.40          | 22.18 ± 8.38     | 0.98 ± 0.28     | 20.27 ± 8.13     | #P=0.0006                                      |
| Plasma XO Activity,<br>μUnits/mL | 31.62 ± 9.03    | 114.65 ± 24.76 | 90.29 ± 24.14        | 1330.62 ± 502.84 | 58.67 ± 16.85   | 1215.97 ± 487.55 | #P=0.0006                                      |

Definition of abbreviations: XO = xanthine oxidase. #Values are mean ± SEM using a Mann Whitney test.



Supplemental Figure 2

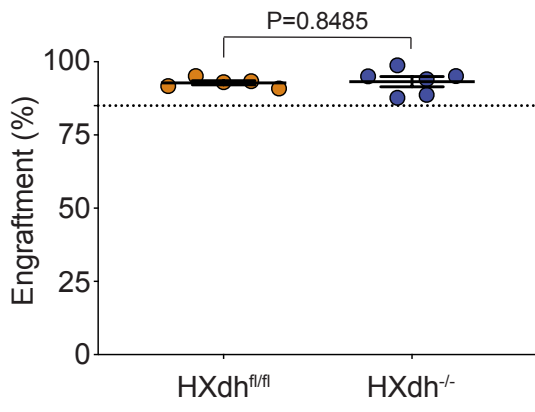

**Supplemental Table III.** Hepatocyte specific XO knockout decreased liver XO activity without impacting lung or kidney XO activity.

|        |                          | Post-Hemin Challenge         |                              | Significance |
|--------|--------------------------|------------------------------|------------------------------|--------------|
|        |                          | HXdh <sup>f/f</sup><br>(n=5) | HXdh <sup>-/-</sup><br>(n=6) |              |
| Liver  | Uric Acid, $\mu\text{M}$ | 99.76 $\pm$ 7.37             | 14.24 $\pm$ 3.20             | P<0.0001     |
|        | XO Activity, mU/mg       | 23.46 $\pm$ 1.61             | 3.62 $\pm$ 0.81              | P<0.0001     |
| Lung   | Uric Acid, $\mu\text{M}$ | 4.01 $\pm$ 2.82              | 6.69 $\pm$ 3.06              | #P=0.3939    |
|        | XO Activity, mU/mg       | 3.16 $\pm$ 2.22              | 5.86 $\pm$ 2.52              | #P=0.5130    |
| Kidney | Uric Acid, $\mu\text{M}$ | 13.70 $\pm$ 2.15             | 13.35 $\pm$ 1.30             | P=0.8898     |
|        | XO Activity, mU/mg       | 4.04 $\pm$ 0.65              | 4.14 $\pm$ 0.32              | P=0.8952     |

Definition of abbreviations: XO = xanthine oxidase. Values are mean  $\pm$  SEM using an unpaired t test unless otherwise noted. #Values are mean  $\pm$  SEM using a Mann-Whitney test.

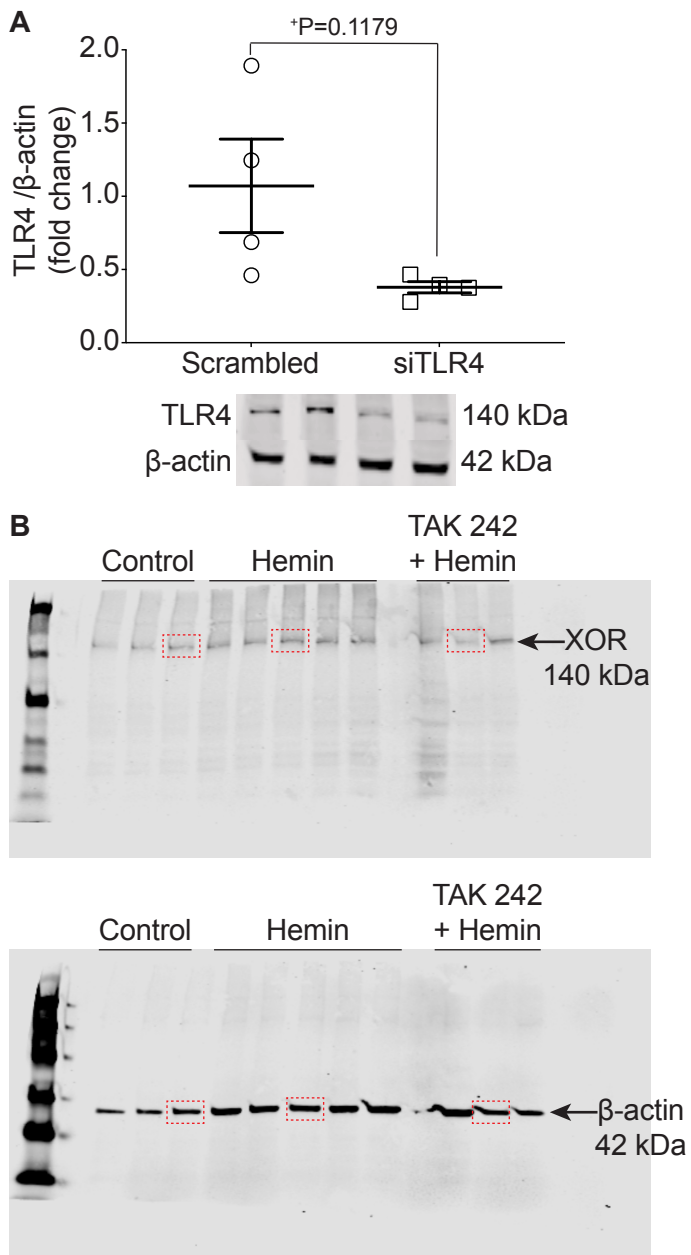

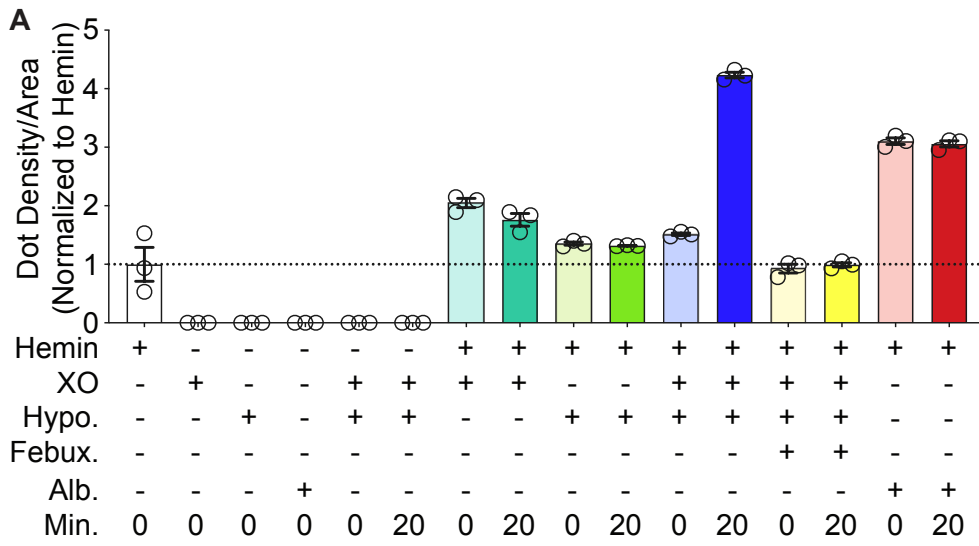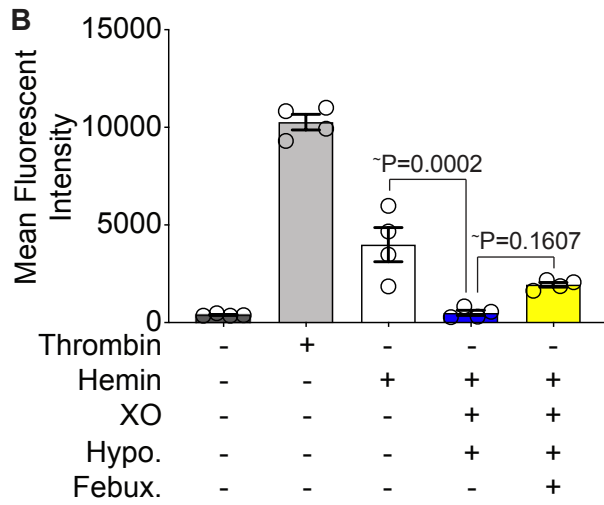

Supplement: mmc1.pdf [file mmc1.pdf]
